# Supplementary material
Source: publisher figshare collection journal article supplement (https://tandf.figshare.com/ndownloader/files/14644391)
Supplement: Supplementary file 1 [file 14644391]

**Supplementary Figures**

**Supplementary Figure 1. Example of two phase decay curves fitted by non-linear regression to patients with multiple levels**

B

Parameters but not dose were shared between all data sets when deriving the best fit. The 4 green lines are illustrative only – they were generated from various arbitrary starting points (inserting 4 values of C0: 300, 100, 30, 10) using the derived non-linear regression two phase decay equation [Ct = C0*(98.23*EXP(-0.758*t)+3*EXP(-0.03445*t))]. (A) Linear plot, (B) Log2 plot

**B**

**A**

**Supplementary Figure 2. Serum biomarker concentration profiles following *Gloriosa superba* poisoning**

Serial serum concentration of absolute sCr (A) and sCysC ( B ) over the first 72 hours are depicted [Black dotted line – NoAKI, purple dotted line – AKIN 1, green dotted line – AKIN 2 red dotted line – AKIN 3]. The shaded area illustrates the normal range based on respective biomarkers measured in healthy individuals (dark gray area - 5th – 75th percentile; light gray area - 75th percentile – 95th percentile).

**D**

**C**

**B**

**A**

**Supplementary Figure 3. Urinary biomarker concentrations profiles following *Gloriosa superba* poisoning**

Serial concentration of normalized biomarkers over the first 72 hours are depicted [Black dotted line – NoAKI, purple dotted line – AKIN 1, green dotted line – AKIN 2 red dotted line – AKIN 3]. The gray shaded area illustrates the normal range based on respective biomarkers measured in healthy individuals (dark gray area - 5th -75th percentile; light gray area - 75th percentile – 95th percentile).
